# Supplementary material for: Ga-doping in Li 0.33 La 0.56 TiO 3 : a promising approach to boost ionic conductivity in solid electrolytes for high-performance all-solid-state lithium-ion batteries
Source: Royal Society of Chemistry journal article supplement (doi:10.1039/d4ra08811e), 2025-01-01
Supplement: d4ra08811e1.pdf [file d4ra08811e1.pdf]

## Supporting Information

# **Ga-Doping in $\text{Li}_{0.33}\text{La}_{0.56}\text{TiO}_3$ : A Promising Approach to Boost Ionic Conductivity in Solid Electrolytes for High-Performance All-Solid-State Lithium-Ion Batteries**

Md. Nagib Mahfuz<sup>a1</sup>, Appy Feroz Nura<sup>a1</sup>, Md Shafayatul Islam<sup>b</sup>, Tomal Saha<sup>a</sup>, Koushik Roy Chowdhury<sup>a</sup>, Sheikh Manjura Hoque<sup>d</sup>, Md Abdul Gafur<sup>c</sup>, Aninda Nafis Ahmed<sup>c\*</sup>, Ahmed Sharif<sup>a\*</sup>

<sup>a</sup>Department of Materials and Metallurgical Engineering, Bangladesh University of Engineering & Technology (BUET), Dhaka, Bangladesh.

<sup>b</sup>Department of Materials Science and Engineering, University of Illinois Urbana Champaign, Urbana, Illinois, 61801, USA

<sup>c</sup>Pilot Plant and Process Development Centre, Bangladesh Council of Scientific and Industrial Research (BCSIR), Dhaka 1205, Bangladesh

<sup>d</sup>Materials Science Division, Atomic Energy Centre, Dhaka 1000, Bangladesh

<sup>1</sup>Md. Nagib Mahfuz and Appy Feroz Nura contributed equally to this work

\*Corresponding Author's Email: asharif@mme.buet.ac.bd (Dr. Ahmed Sharif) and a\_nafis\_ahmed@bcsir.gov.bd (Dr. Aninda Nafis Ahmed)

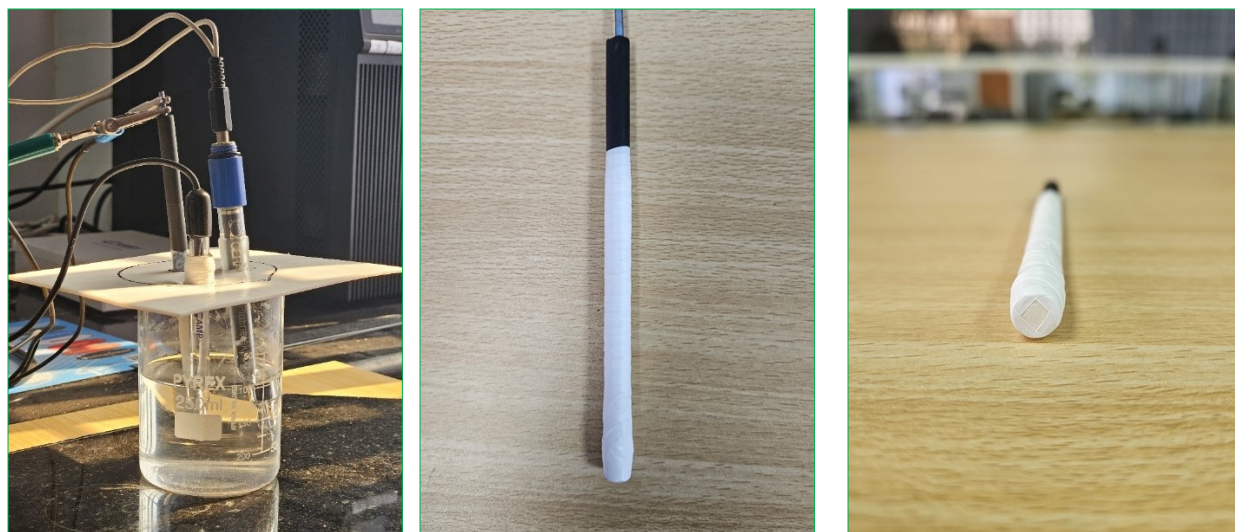

*Figure S1: EIS cell setup and electrode preparation*

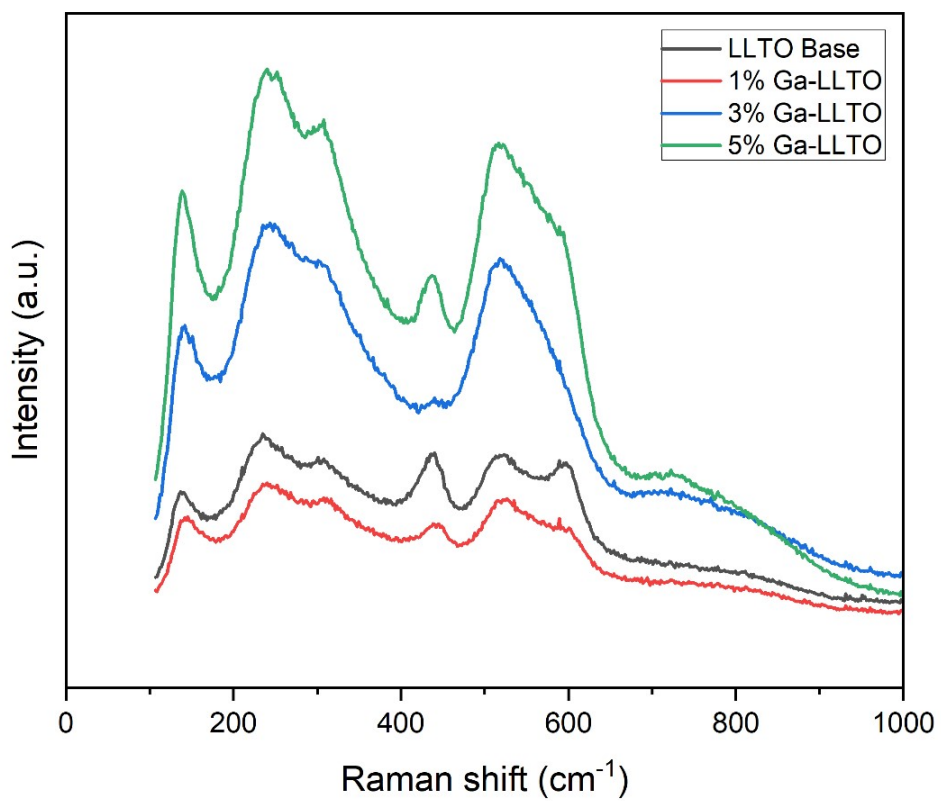

*Figure S2: Raman spectra of LLTO samples*

The Raman spectra of the LLTO and Ga-LLTO shows peaks positioned at ~ 140, 240, 308, 445, 526 and 589 cm<sup>-1</sup>. These peak positions match closely with reported values for LLTO, further confirming the tetragonal structure<sup>1</sup>. After Ga substitution, the intensity of the peaks at 140, 240 and 526 cm<sup>-1</sup> increases, which are attributed to E<sub>g</sub> vibrational mode and corresponds to Ti displacement and TiO<sub>6</sub> tilting.

**Table S1 : Agreement indices**

|                          |                           | <b>Base LLTO</b> | <b>1% Ga-LLTO</b> | <b>3% Ga-LLTO</b> | <b>5% Ga-LLTO</b> |
|--------------------------|---------------------------|------------------|-------------------|-------------------|-------------------|
| <b>Agreement Indices</b> | <b>R expected</b>         | 8.48             | 8.67              | 8.61              | 7.92              |
|                          | <b>R profile</b>          | 7.77             | 8.82              | 8.00              | 8.73              |
|                          | <b>Weighted R profile</b> | 11.52            | 12.96             | 12.00             | 12.72             |
|                          | <b>Goodness of Fit</b>    | 1.36             | 1.49              | 1.39              | 1.61              |
| <b>Crystallinity</b>     | <b>(%)</b>                | 97.55            | 97.23             | 96.81             | 96.10             |

### **Crystallite size and microstrain from Williamson-Hall Plot<sup>2</sup> :**

In XRD data, the broadening of peaks is due to the combined effect of crystallite size and microstrain i.e.,  $\beta_T = \beta_D + \beta_\epsilon$

where  $\beta_T$  is the total broadening,  $\beta_D$  is the broadening due to crystallite size and  $\beta_\epsilon$  is the broadening due to microstrain. According to the Scherrer equation,

$$D = \frac{K \lambda}{\beta_D \cos \theta} \dots \dots \dots (1)$$

where D is the crystallite size,  $\lambda$  is the wavelength of the X-ray source ( $\lambda = 0.154065 \text{ nm}$ ), K (= 0.9) is the shape factor, and  $\theta$  is the peak position. From equation (1), the peak broadening due to crystallite size is:

$$\beta_D = \frac{K \lambda}{D \cos \theta} \dots \dots \dots (2)$$

The peak broadening due to microstrain is:

$$\beta_{\varepsilon} = 4 \varepsilon \tan \theta \dots\dots\dots(3)$$

So, the total broadening of the XRD peaks becomes:

$$\beta_T = \frac{K \lambda}{D \cos \theta} + 4 \varepsilon \tan \theta \dots\dots\dots(4)$$

$$\text{or, } \beta_T = \frac{K \lambda}{D \cos \theta} + 4 \varepsilon \frac{\sin \theta}{\cos \theta} \quad [\tan \theta = \frac{\sin \theta}{\cos \theta}]$$

$$\text{or, } \cos \theta \beta_T = \frac{K \lambda}{D} + 4 \varepsilon \sin \theta \quad [\text{Multiplying both sides by } \cos \theta]$$

$$\therefore \beta_T \cos \theta = \varepsilon (4 \sin \theta) + \frac{K \lambda}{D} \dots\dots\dots(5)$$

The equation (5) represents a straight-line  $y = mx + c$  where,  $y = \beta_T \cos \theta$ ,  $m$  (slope) =  $\varepsilon$  (microstrain),  $x = 4 \sin \theta$ ,  $c$  (y-intercept) =  $\frac{K \lambda}{D}$ .

Again, the dislocation density ( $\delta$ ) was calculated using the following equation:

$$\delta = \frac{1}{D^2} \dots\dots\dots(6)$$

**Table S2: Crystallite size, Dislocation density, and Micro strain calculated from Williamson Hall Plot**

|                   | Crystallite size,<br>D (nm) | Dislocation Density, $\delta$<br>( $\times 10^{-5} \text{ nm}^2$ ) | Micro Strain<br>( $\varepsilon \times 10^{-3}$ ) |
|-------------------|-----------------------------|--------------------------------------------------------------------|--------------------------------------------------|
| <b>Base LLTO</b>  | 166.02                      | 3.63                                                               | 1.33                                             |
| <b>1% Ga-LLTO</b> | 141.98                      | 4.96                                                               | 1.63                                             |
| <b>3% Ga-LLTO</b> | 103.44                      | 9.35                                                               | 1.67                                             |
| <b>5% Ga-LLTO</b> | 78.28                       | 16.3                                                               | 1.79                                             |

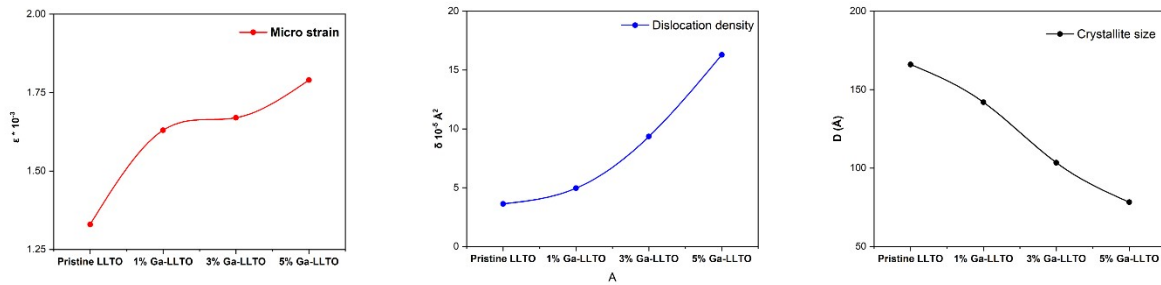

**Figure S3: Micro strain (a), dislocation density (b) and crystallite size (c)**

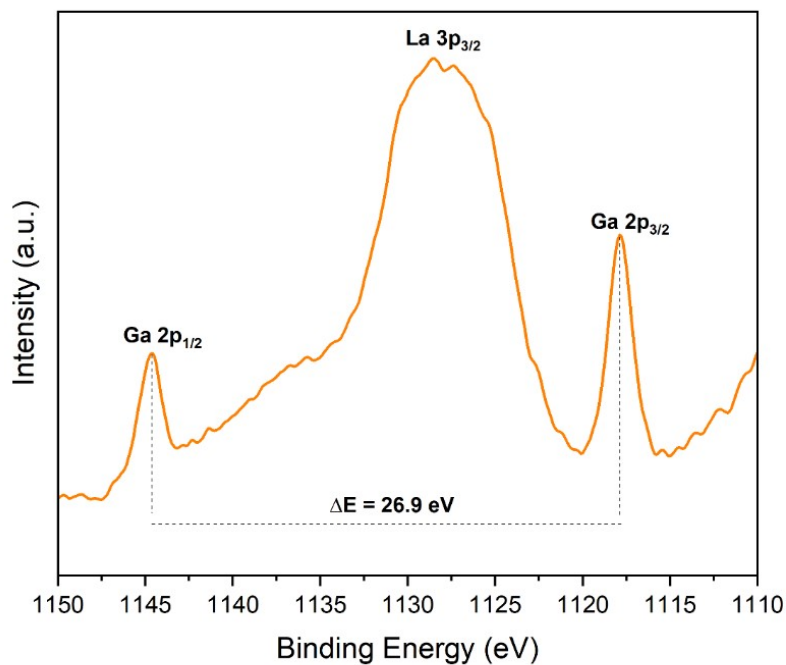

**Figure S4: La  $3p_{3/2}$  peak in 3% Ga-LLTO**

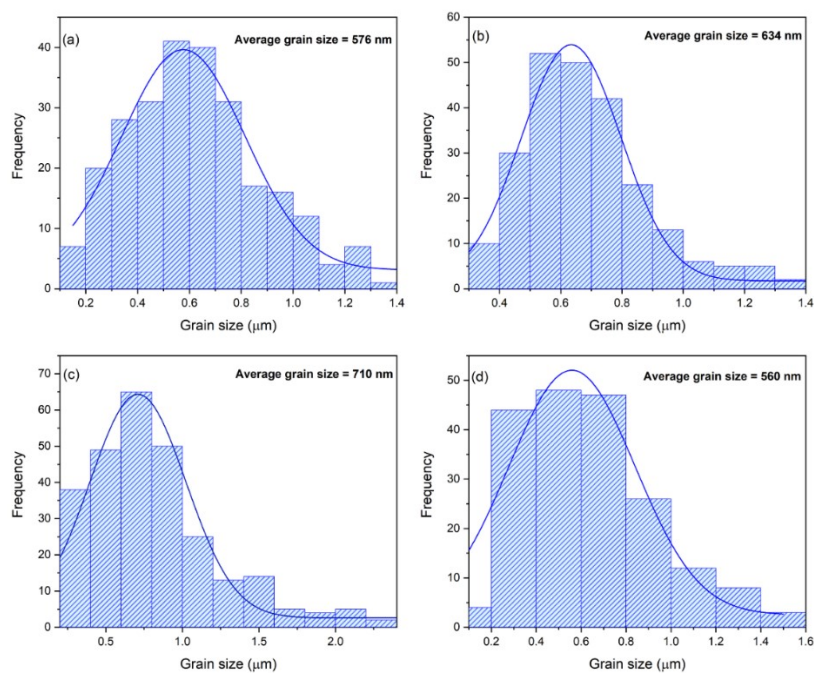

**Figure S5: Grain size distributions of  $\text{Li}_{0.33+x}\text{La}_{0.56}\text{Ti}_{1-x}\text{Ga}_x\text{O}_3$ , (a)  $x=0.00$ , (b)  $x=0.01$ , (c)  $x=0.03$  and (d)  $x=0.05$**

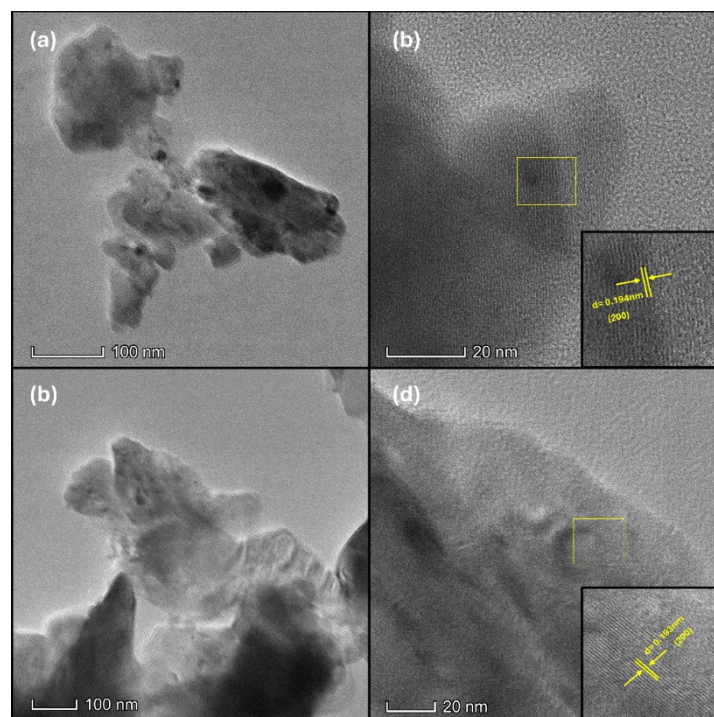

**Figure S6: TEM images and lattice fringes of (a), (b), Base LLTO and (c), (d) 5% Ga-LLTO**

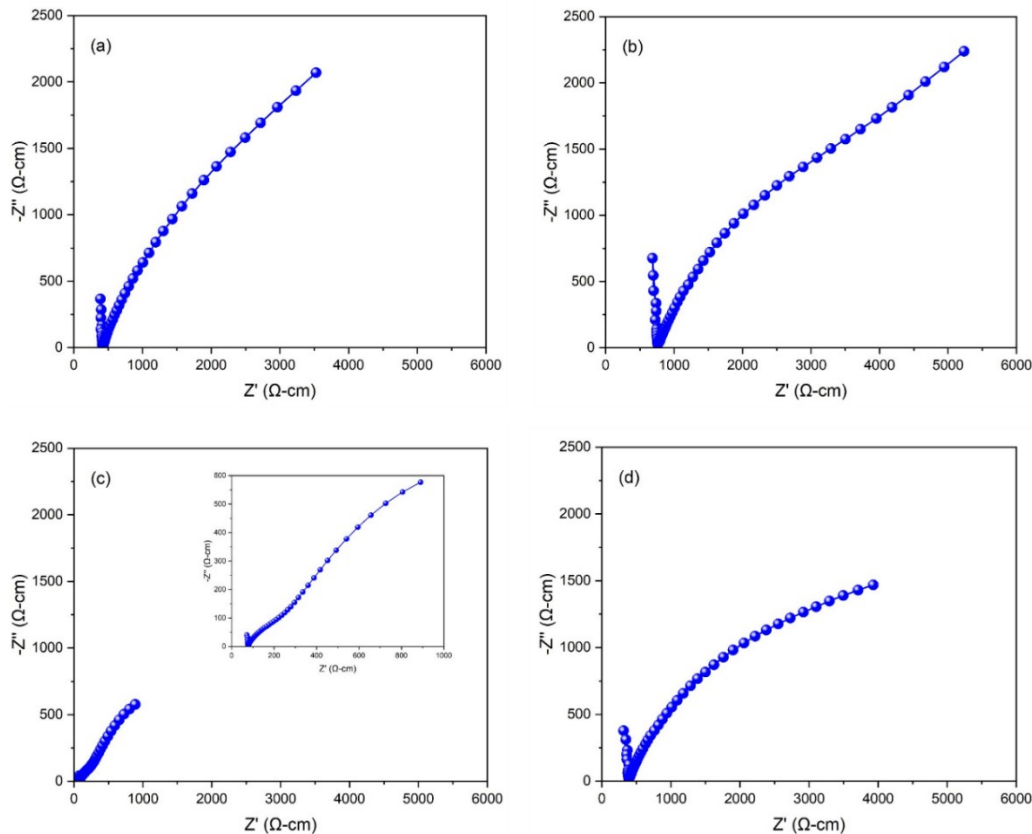

**Figure S7: Nyquist plots of  $\text{Li}_{0.33+x}\text{La}_{0.56}\text{Ti}_{1-x}\text{Ga}_x\text{O}_3$  sintered at 1100 °C (a)  $x=0.00$ , (b)  $x=0.01$ , (c)  $x=0.03$  and (d)  $x=0.05$**

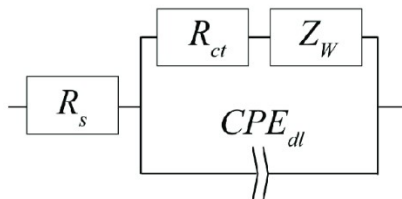

**Figure S8: Equivalent circuit of Randle's model.**

The series resistance  $R_s$  primarily comes from the ionic resistance of the liquid electrolyte LiOH. This value was found from the first intercept of the impedance spectrum on the real axis ( $Z'$  axis) and it was consistently close across measurements, with only minor variations.  $R_{ct}$  is the resistance of LLTO material coated on the top surface of the carbon electrode, which is related to the migration of  $Li^+$  ions in the grain interior and across grain boundaries. The diameter of the semicircle provides the value of this resistance.  $Z_w$  is the Warburg Impedance which is related to  $Li^+$  diffusion at the Carbon electrode surface. The constant phase element, (CPE) is due to the double-layer capacitance at the electrolyte/electrode surface.

**Table S3: Thickness of the LLTO solid electrolytes**

| LLTO Solid Electrolytes | Thickness (cm) |
|-------------------------|----------------|
| Base LLTO               | 0.005          |
| 1% Ga-LLTO              | 0.004          |
| 3% Ga-LLTO              | 0.004          |
| 5% Ga-LLTO              | 0.006          |

**Table S4: Change in Ti-O bond length along the c-axis of LLTO**

| Composition | Ti-O Short Bond                | Ti-O Long Bond                 | Conductivity $\sigma$ (S/cm) |
|-------------|--------------------------------|--------------------------------|------------------------------|
|             | Length<br>along the C-axis (Å) | Length along the C-axis<br>(Å) |                              |
| Base LLTO   | 1.80424                        | 2.06752                        | $2.04 \times 10^{-4}$        |
| 1% Ga-LLTO  | 1.80498                        | 2.06837                        | $2.46 \times 10^{-4}$        |
| 3% Ga-LLTO  | 1.80706                        | 2.07075                        | $4.15 \times 10^{-3}$        |
| 5% Ga-LLTO  | 1.80381                        | 2.06703                        | $1.65 \times 10^{-4}$        |

**Table S5: Comparison of ionic conductivity of Ga-LLTO solid electrolyte with previously reported LLTO materials in the literature**

| Composition                               | Ionic Conductivity (S cm <sup>-1</sup> ) | Reference |
|-------------------------------------------|------------------------------------------|-----------|
| $Li_{0.225}La_{0.625}Al_{0.1}Ti_{0.9}O_3$ | $1.51 \times 10^{-3}$                    | 3         |



|                                                                                        |                       |           |
|----------------------------------------------------------------------------------------|-----------------------|-----------|
| $(\text{Li}_{0.33}\text{La}_{0.56})_{1.005}\text{Ti}_{0.99}\text{Al}_{0.01}\text{O}_3$ | $2.25 \times 10^{-4}$ | 4         |
| $\text{Li}_{0.43}\text{La}_{0.56}\text{Ti}_{0.95}\text{Ge}_{0.05}\text{O}_3$           | $1.20 \times 10^{-5}$ | 5         |
| $\text{Li}_{0.33}\text{La}_{0.56}\text{TiO}_3$                                         | $4.42 \times 10^{-5}$ | 6         |
| $\text{Li}_{0.36}\text{La}_{0.56}\text{Ti}_{0.97}\text{Ga}_{0.03}\text{O}_3$           | $4.15 \times 10^{-3}$ | This work |

**Table S6: Integral areas of the CV curve of the LLTO samples**

| Composition       | Integral Area ( $\text{Cs}^{-1}\text{V}$ ) |             |
|-------------------|--------------------------------------------|-------------|
|                   | 10 mV/s                                    | 50mV/s      |
| <b>Base LLTO</b>  | 0.001711207                                | 0.002430147 |
| <b>1% Ga-LLTO</b> | 0.002346020                                | 0.002860019 |
| <b>3% Ga-LLTO</b> | 0.002819831                                | 0.004581898 |
| <b>5% Ga-LLTO</b> | 0.001468660                                | 0.002105097 |

## BIBLIOGRAPHY

- 1 H. M. Omanda, H. Gnanga, P. Soulounganga, R. O. Ndong, A. Eya'A-Mvongbote, Z. H. M. Membetsi and A. Bulou, *International Journal of Engineering Research & Technology*, 2014.
- 2 J. O. Bonsu, A. Bhadra and D. Kundu, *Advanced Science*, 2024, 11, 2403208.
- 3 J. Lu, Y. Li and Y. Ding, *Mater Res Bull*, 2021, 133, 111019.
- 4 H. T. T. Le, R. S. Kalubarme, D. T. Ngo, H. S. Jadhav and C. J. Park, *J. Mater. Chem. A*, 2015, 3, 22421–22431.
- 5 Z. Hu, J. Sheng, J. Chen, G. Sheng, Y. Li, X. Z. Fu, L. Wang, R. Sun and C. P. Wong, *New J. Chem.*, 2018, 42, 9074–9079.
- 6 T. Teranishi, Y. Ishii, H. Hayashi and A. Kishimoto, *Solid State Ion*, 2016, 284, 1–6.
